## High fidelity hypothermic preservation of primary tissues in organ transplant preservative for single cell transcriptome analysis

Wanxin Wang<sup>1,5</sup>, Lolita Penland<sup>1,5</sup>, Ozgun Gokce<sup>3,4</sup>, Derek Croote<sup>1</sup>, Stephen Quake<sup>1,2\*</sup>

### **Affiliations**

<sup>1</sup> Department of Bioengineering,

<sup>2</sup> Department of Applied Physics,

<sup>3</sup> Department of Molecular and Cellular Physiology,  
Stanford University, Stanford, CA, 94305, USA

<sup>4</sup> Institute for Stroke and Dementia Research, Klinikum der Universität München,  
Ludwig Maximilians Universität LMU, Munich, 81377, Germany

<sup>5</sup> Equal contribution

### **\* Corresponding Author**

Stephen Quake

James H Clark Center E300

318 Campus Drive

Stanford CA 94305

650-721-2195

quake@stanford.edu

1 **Abstract**

2 **Background**

3 High-fidelity preservation strategies for primary tissues are in great demand in the single  
4 cell RNAseq community. A reliable method will greatly expand the scope of feasible  
5 collaborations and maximize the utilization of technical expertise. When choosing a  
6 method, standardizability is as important a factor to consider as fidelity due to the  
7 susceptibility of single-cell RNAseq analysis to technical noises. Existing approaches  
8 such as cryopreservation and chemical fixation are less than ideal for failing to satisfy  
9 either or both of these standards.

10 **Results**

11 Here we propose a new strategy that leverages preservation schemes developed for organ  
12 transplantation. We evaluated the strategy by storing intact mouse kidneys in organ  
13 transplant preservative solution at hypothermic temperature for up to 4 days (6 hrs, 1, 2,  
14 3, and 4 days), and comparing the quality of preserved and fresh samples using FACS  
15 and single cell RNAseq. We demonstrate that the strategy effectively maintained cell  
16 viability, transcriptome integrity, cell population heterogeneity, and transcriptome  
17 landscape stability for samples after up to 3 days of preservation. The strategy also  
18 facilitated the definition of the diverse spectrum of kidney resident immune cells, to our  
19 knowledge the first time at single cell resolution.

20 **Conclusions**

21 Hypothermic storage of intact primary tissues in organ transplant preservative maintains  
22 the quality and stability of the transcriptome of cells for single cell RNAseq analysis. The

23 strategy is readily generalizable to primary specimens from other tissue types for single  
24 cell RNAseq analysis.

25

## 26 **Keywords**

27 Single cell RNAseq - Primary tissue preservation - Hypothermic preservation - Organ  
28 transplant preservation - Organ transplant preservative - Kidney resident immune cells

29

## 30 **Background**

31 Quantitative profiling of transcriptome landscapes at single cell resolution (scRNAseq)  
32 has brought new insights in understanding cell types [1,2], states [3], and interactions [4]  
33 in the inherently heterogeneous primary tissues. It, however, has also raised new  
34 logistical challenges in the specimen conduit from tissue collection sites to laboratories.  
35 The low tolerance to cell damage and RNA degradation in scRNAseq and the less  
36 resilient nature of cells in primary tissues make it imperative to process primary specimen  
37 immediately after procurement, imposing logistical hurdles especially for collaborations  
38 in a multi-institutional setting.

39 A preservation strategy enabling primary tissue storage and transportation will greatly  
40 change the status quo and facilitate collaboration between basic science laboratories and  
41 distributed medical centers where tissue is collected. Cryopreservation and chemical  
42 fixation have been pursued [5–8], but neither is proven ideal for scRNAseq. In the case of  
43 cryopreservation in scRNAseq, a recent study reported tolerable impact of elevated cell  
44 death from freeze-thaw on cell lines and specimens with well-represented cell types [6];  
45 another study reported an insufficient recovery and reduced transcriptome complexity for

46 low-abundant and less resilient populations [5]. The susceptibility to handling variations  
47 and potential variability in freezing media compositions (e.g. serum) pose challenges for  
48 standardization. Furthermore, cryopreservation requires mincing the sample as well as  
49 maintenance of temperatures down to -80 °C. Crosslinking-based chemical fixation, on  
50 the other hand, suffers from low recovery of intact mRNA, while alcohol dehydration-  
51 based fixation has yet to show high generalizability from cell cultures to primary tissues  
52 [8]. Moreover, for efficient isolation of single cells, fixation is preferentially done on  
53 single-cell suspensions [7, 8], making it a necessity to perform tissue dissociation, usually  
54 a critical step for scRNAseq, at tissue collection sites. In fact, the aforementioned  
55 approaches all require that a multi-step protocol be performed at the collection sites,  
56 where experienced personnel are not always available and technical variations can be  
57 introduced.

58 An ideal strategy would avoid drastic physical or chemical changes on the primary  
59 specimen and require minimal processing at tissue collection sites. This requirement has  
60 much in common with the preservation of organ transplants, which uses hypothermic  
61 temperatures to reduce cell metabolism and increase tolerance to insults such as ischemia  
62 and hypoxia [9]. Preserving solutions for hypothermic organ preservation hence are  
63 designed to address cell-injuring events caused by hypothermia, including ionic  
64 imbalance, acidosis, and free radical production [9–11]. Exemplars such as the University  
65 of Wisconsin (UW) solution demonstrated high generalizability in preserving post  
66 transplant functionality of pancreas (72 hr), kidney (72 hr), and liver (30 hr) [11]. A  
67 commercial preparation of such preservative for research use, Hypothermosol-FRS  
68 (HTS-FRS), has been increasingly employed in handling primary tissues [12], cells [13–

69 15], and engineered tissue products [16,17]. Comparative studies done on a spectrum of  
70 sample types including human hepatocytes [13], coronary artery smooth muscle cells  
71 [14], bone-marrow derived mesenchymal stem cells [15], and mouse hippocampus [12]  
72 demonstrated superior efficacy of HTS-FRS in maintaining cell viability compared i) to  
73 cell culture media and, in some cases, UW solution in hypothermia as well as ii) to  
74 cryopreservation. However, previous studies of the physiologic effects of this approach  
75 were mainly limited to viability assays and microscopic examination that interrogate  
76 membrane permeability, metabolic activity, cell morphology and surface marker  
77 expression. Given that the rapid degradation of RNA could precede the deterioration of  
78 these examined parameters [18], previous reports are insufficient to conclude whether  
79 preservation fidelity is suitable for scRNAseq.

80 Here we evaluated hypothermic preservation of primary specimen in HTS-FRS for use in  
81 scRNAseq. We used FACS to compare viability of cells recovered from fresh and  
82 preserved mouse kidneys, and used scRNAseq analysis to demonstrate the efficacy of the  
83 strategy in preserving population heterogeneity, transcriptome integrity, and  
84 transcriptome stability of kidney resident immune cells in kidneys undergoing up to 3  
85 days of preservation. This approach enables one to preserve intact primary specimen at  
86 4°C for periods suitable for long distance transportation of samples and standardization  
87 of experimental approaches in expert labs.

## 88 **Results**

89 We designed our experimental procedure such that preservation preceded dissociation  
90 (Figure 1). Specifically, intact kidneys were preserved for 0, 6 hour, or 1-4 days  
91 immediately following harvest. After the chosen duration of preservation, we

92 enzymatically digested the tissues into single cell suspension and used FACS to assess  
93 overall cell viability. We then used the surface marker Cd45 to enrich for kidney resident  
94 immune cells to further evaluate our strategy in the context of scRNAseq, given i) that  
95 this population encompasses a diverse spectrum of immune lineages with varying  
96 abundance, and ii) the population's critical role in renal injuries and diseases [19–21].

97 Over the examined durations of preservation, we observed no notable time-associated  
98 reduction for the fractions of propidium iodide negative (PI-) and Cd45+ populations  
99 (Figure 2A, Additional file 1: Figure S1), suggesting that the strategy effectively retained  
100 the overall cell viability and the cell surface marker integrity. For each timepoint, PI- and  
101 Cd45+ single cells were sorted for scRNAseq analysis. cDNA synthesis on sorted cells  
102 gave no notable smearing towards lower fragment sizes for preserved samples  
103 (Additional file 1: Figure S2) and comparable success rates in getting sufficient cDNA ( $\geq$   
104 2 ng) between fresh samples and those after up to 3 days of preservation (Figure 2A). The  
105 success rate dropped notably at day 4, despite that the fraction of PI- cells stayed  
106 comparable with that of fresh, indicative of the notation that mRNA degradation  
107 preceded cell membrane permeabilization in early cell death events [18].

108 510 single cells with sufficient cDNA level ( $\geq$ 2 ng) were sequenced; 502 (98%) passed  
109 quality filtering and were retained for downstream analysis (Figure 1B and 2A). To  
110 further evaluate mRNA integrity, we examined 5' to 3' read coverage across all exons for  
111 each single cell, and observed no more bias towards 3' in preserved samples than in fresh  
112 samples (Figure 2B), which was further supported by both qualitative inspection of the  
113 coverage curves for individual cells (Additional file 1: Figure S3) and quantitative  
114 assessment of the collective skewness of curves for each timepoint (Additional file 1:

115 Figure S4). In addition, the number of genes detected per cell did not drop noticeably  
116 until after 4 days of preservation (Figure 2C).

117 We next assessed the impact of preservation on the cell type heterogeneity of kidney  
118 resident immune cells. To explore the data in an unbiased manner, we performed  
119 dimensional reduction using whole-transcriptome information via t-distributed stochastic  
120 neighbor embedding (tSNE). In the resulting 2-dimensional tSNE space (Figure 2D),  
121 single cells formed well-segregated clusters, which we defined into 9 putative clusters  
122 computationally (Figure 3A). Given that it is clear that preservation time is not the  
123 driving force for the segregation of the clusters (Figure 3B), we hypothesized that the  
124 source of the segregation was the cell type heterogeneity in kidney resident immune cells,  
125 and performed hierarchical clustering on a panel of canonical markers that define major  
126 lineages of immune cells. The resulting outcome of the clustering was nearly identical to  
127 that observed in the tSNE space (Figure 3C), confirming our hypothesis.

128 It is noteworthy that although 7 out of the 9 clusters defined by both methods can be  
129 unambiguously identified as known immune populations (Figure 3C), there are 2 (cluster  
130 8 and 9) that cannot be assigned using classical definitions. Unbiased differential  
131 expression analysis on cluster 8 revealed a list of genes that are uniquely expressed in this  
132 cluster (Figure 3D, Additional file2: Table S1) with enriched ontology terms (Figure 3E,  
133 Additional file3: Table S2) suggesting it is a putative lymphocyte population that  
134 resembles T cells but lacks classical T cell marker expression. Cluster 9, on the other  
135 hand, is most likely a low quality/apoptosing macrophage population due to its absence in  
136 fresh samples (Figure 3B), the lack of uniquely expressing markers identified (Additional  
137 file1: Figure S5B), the lack of Cd45/Ptprc expression (Figure 3C), and the low number of

138 genes expressed (Figure 3C, Additional file1: Figure S5A), and hence were excluded in  
139 further analysis as a defined population. Each defined population, determined by both  
140 methods, is a mixture of cells from fresh tissues and tissues after all examined  
141 preservation time (Figure 3B and 3C), revealing no preservation associated batch effect.  
142 To summarize, the fact that all defined populations were present in fresh tissues and  
143 recapitulated over examined duration of preservation validated our definition of cell types  
144 in kidney resident immune cells. Moreover, the proposed preservation strategy effectively  
145 maintained the heterogeneity of cell types that exist in varying abundance.

146 We then compared the transcriptome of fresh and preserved cells within each defined cell  
147 type. For all cell types, we calculated pair-wise correlations between cells within and  
148 between different preservation conditions. The distribution of correlations was not  
149 associated with preservation time (Figure 4A and 4B). Variation in the distributions was  
150 dictated by, to greater extent, the heterogeneity within a preservation condition, which  
151 also demonstrated no association with time. For lymphocyte populations, we specifically  
152 examined the transcripts encoding B cell antibodies (Ig) and T cell receptors (TCR) given  
153 their essential roles in B and T cell functions and frequent interrogation by single cell  
154 studies. As shown in Figure 4C, expression of key components of Ig and TCR were  
155 indistinguishable between fresh and preserved tissues. For B cells, extracting full-length  
156 antibody sequence is required for in-depth examination on usage and mutation in variable  
157 (V) and joining (J) segments, sequence of complementary-determining region 3 (CDR3),  
158 isotypes, as well as affinities. We hence evaluated the success rate in obtaining the  
159 information using *de novo* assembly and the impact of preservation on it. From all B cells  
160 identified from fresh and preserved tissues, we were able to identify contigs containing



161 complete variable and constant regions for Ig heavy and light chains (Additional file 4:  
162 Table S3). The rate of dropout events where only one chain is identifiable is comparably  
163 low between fresh and preserved tissues when statistical power holds (Figure 4D). To this  
164 end, the strategy conserved the transcriptome profile within identified populations.

## 165 **Discussion**

166 Hypothermic preservation of primary tissues in organ transplant preservative effectively  
167 maintained the viability, transcriptome integrity, and transcriptome profile stability of  
168 cells for scRNAseq. Cells recovered from tissues after up to 3 days of preservation  
169 demonstrated minimal 3' bias in the read coverage of exons and comparable cell type  
170 heterogeneity compared to cells from freshly harvested tissues.

171 Resident immune cells from kidneys were used for evaluation in the context of  
172 scRNAseq because of their known heterogeneity and the vast interest they have drawn in  
173 kidney injuries. We were able to define 8 cell types in this population, supported by their  
174 presence in fresh tissue and consistent recapitulation in preserved tissues. Within each  
175 population, the preservation strategy did not introduce quantitative perturbations on the  
176 overall transcriptome profile, and faithfully preserved Ig and TCR transcripts to a degree  
177 that we could assemble full-length transcript sequences for these highly variable genes  
178 for higher resolution interrogations.

179 This approach enables an actionable time window (48-72 hr) to be opened up for the  
180 transportation of primary specimen from the sample collection sites to the technology  
181 sites through express couriers.

182 The strategy is ideal for scRNAseq also due to its high potential in standardization.

183 Preservation can happen on intact tissues immediately after tissue excision with  
184 minimum intervention. Procedures that are susceptible to technical variations could be  
185 done at the technology sites in a centralized manner, minimizing the introduction of  
186 technical noise, especially in highly variable steps such as dissociation. In addition, the  
187 preserving solution functions in a serum-free formulation, and hence is free from  
188 variations introduced by lot-to-lot difference in serum preparations.

189 Thanks to the progress made by the organ preservation community, available  
190 preservatives such as UW and HTS-FRS already demonstrated high generalizability in  
191 preserving functionality in diverse organ types, including pancreas and heart. We  
192 therefore expect that the proposed strategy be readily generalizable to other tissue types  
193 for scRNAseq as well as for other procedures such xenograft and organoid generation.

## 194 **Conclusions**

195 At single cell resolution, primary tissues after 6 hours to 3 days of hypothermic  
196 preservation in organ transplant preservative demonstrated similar cell viability, cell type  
197 heterogeneity, transcriptome integrity, and transcriptome profile compared to fresh  
198 tissues. The strategy is ideal for scRNAseq given its high fidelity and standardizability.  
199 The procedure highly resembles the routine handling of specimen in clinics and hence  
200 makes it practical to engage clinicians in collaborations, which are essential for the  
201 scRNAseq community as well as highly collaborative endeavors such as Human Cell  
202 Atlas.

## 203 **Methods**

### 204 **Mouse kidney isolation, preservation, and dissociation**

205 Single-cell experiments were performed on kidneys of CD1 wild type mice. Mice were  
206 housed in filtered cages and all experiments were performed in accordance with approved  
207 Institutional Animal Care and Use Committee protocols.

208 Experiments were performed on both lungs or on 1.5 lungs that were pooled from the  
209 same mouse for the time points 0-2 days and 3-4 days, respectively. .

210 Mice of ~3 week old were euthanized by administration of CO<sub>2</sub>. Kidneys were harvested  
211 *en bloc* without perfusion and were either dissociated immediately for single cell sort or  
212 preserved in the HypoThermosol<sup>®</sup> FRS solution (BioLifeSolutions) at 4 °C for 6 hrs, 1, 2,  
213 3, or 4 days before dissociation and further processing.

214 Kidneys were minced with a razor blade and dissociated in Liberase DL (Roche) in  
215 RPMI 1640 (LifeTechnologies) with horizontal agitation at 180rpm at 37 °C for 20 min.  
216 The resulting single-cell suspension was sequentially passed through a 100 µm, a 70 µm,  
217 and a 40 µm strainer (Fisher) and then centrifuged at 300 ×g for 15 min. Pelleted cells  
218 were resuspended in ACK red blood cell lysing buffer (Thermo Fisher), incubated for 5  
219 min, quenched with 1 volume PBS (ThermoFisher) containing 2% FBS (ThermoFisher),  
220 centrifuged at 300 ×g for 5 min, and then resuspended in FACS staining buffer (BD  
221 Biosciences).

## 222 **Single-cell sorts, cDNA generation, library preparation, and sequencing**

223 Single cells resuspended in the staining buffer were stained with antibody against surface  
224 Cd45 (Cd45-FITC, Sony Biotechnology Inc.) on ice for 20 min following manufacture's  
225 protocol, washed twice with the staining buffer, and then incubated in propidium iodide  
226 (PI) solution (Life Technologies) at room temperature for 10 min. Cell viability was

227 evaluated on FACS (Sony Biotechnology Inc.). Singlet PI Cd45<sup>+</sup> cells were index sorted  
228 onto pre-chilled 96-well plates containing cell lysis buffer using a Sony SH800 sorter.  
229 The plates were vortexed, spun down at 4°C, immediately placed on dry ice, and then  
230 stored at -80 °C. Single-cell cDNA libraries were generated using procedures adapted  
231 from the SmartSeq2 protocol (Picelli et al. 2014). Briefly, mRNA from single cells in 96-  
232 well plates was reverse transcribed using SMARTScribe reverse transcriptase (Clontech),  
233 oligo dT, and TSO oligo to generate the first strand cDNA. Resulting cDNA was  
234 amplified via PCR (21 cycles) using KAPA HiFi HotStart ReadyMix (KAPA  
235 Biosystems) and IS PCR primer. The pre-amplified cDNA was purified using AMPure  
236 XP magnetic beads (Beckman Coulter).

237 Single-cell cDNA size distribution and concentration were analyzed on a capillary  
238 electrophoresis-based automated fragment analyzer (Advanced Analytical). Illumina  
239 cDNA libraries were prepared for single cells (> 2ng cDNA generated) using Nextera XT  
240 DNA Sample Preparation kit (Illumina) with the single cell protocol provided by  
241 Fluidigm. Dual-indexed single-cell libraries were pooled and sequenced in 75bp or 150bp  
242 pair-ended reads on a Nextseq (Illumina) to a depth of 1-1.5 ×10<sup>6</sup> reads per cell.  
243 CASAVA 1.8.2 was used to separate out the data for each single cell by using unique  
244 barcode combinations from the Nextera XT preparation and to generate \*.fastq files.

#### 245 **Processing and analysis of single-cell RNA-seq data**

246 Reads were pre-processed and aligned to mouse reference genome GRCm38 with STAR.  
247 For every gene in the reference, aligned reads were converted to counts using HTseq  
248 under the setting -m intersection-strict \-s no.

249 Downstream data analysis was performed in R. Prior to analysis, cells with less than 1000  
250 reads were excluded, reducing the dataset from 510 cells to 502 cells. For each cell,  
251 counts were normalized to reads per million (rpm) in log<sub>2</sub> scale through division by the  
252 total number of aligned reads, multiplication by  $1 \times 10^6$ , and conversion to log with base 2.  
253 For tSNE, pair-wise distances between cells were calculated using all genes detected.  
254 Dimensional reduction was performed using ViSNE as implemented in the tsne package  
255 [22], and subsequent definition of immune cell lineage clusters were done using  
256 hierarchical clustering implemented using Ward's clustering criterion on the resulting  
257 two t-SNE dimensions. Differential gene-expression was performed using scde package  
258 [23]. Ontology analysis for uniquely expressed genes associated with putative clusters  
259 was done using enrichment analysis of biological process for *Mus Musculus*.  
260 Visualization of the hierarchy of the enriched ontology was done using Revigo [24].

### 261 **Assembly of B cell antibody heavy and light chains**

262 Full length, paired immunoglobulin heavy and light chain sequences from single B-cells  
263 were assembled and annotated by first trimming raw reads with fqtrim, followed by full  
264 transcriptome assembly with Bridger [25]. Immunoglobulin contigs identified through the  
265 presence of a heavy or light chain constant region sequence were then annotated using  
266 IgBLAST [26]. Variable (V), diversity (D), joining (J), and complementarity determining  
267 region (CDR) calls were extracted from the IgBLAST output using Change-O [27].

### 268 **Abbreviations**

269 **scRNAseq:** Single cell RNAseq

270 **UW:** University of Wisconsin solution **HTS-FRS:** Hypothermosol-FRS

271 **PI-:** Propidium iodide negative

272 **tSNE:** t-distributed stochastic neighbor embedding

273 **Ig:** Immunoglobulin/antibody **TCR:** T cell receptor

274 **V:** Variable **D:** Diversity **J:**Joining **CDR:** Complementarity determining region

## 275 **Declarations**

### 276 **Ethics approval and consent to participate**

277 All animal experiments were performed in accordance with approved Institutional

278 Animal Care and Use Committee (IACUC) protocols authorized by Stanford University.

### 279 **Consent for publication**

280 Not applicable.

### 281 **Availability of data and materials**

282 The datasets generated and/or analyzed during the current study are submitted to the

283 NCBI Gene expression Omnibus (GEO, <http://ncbi.nlm.nih.gov/geo>) and will be

284 available upon request.

### 285 **Competing interest**

286 The authors declare no competing interest.

### 287 **Funding**

288 This work was supported by Stanford Accelerated Medical Practice (STAMP) and a

289 BioX graduate fellowship from Stanford University to WW.

### 290 **Author's contributions**

291 WW, LP, and SRQ designed the experiments. LP, WW, and OG performed the

292 experiments. WW and DC performed data analysis. WW and SRQ wrote the manuscript.

293 **Acknowledgements contributions**

294 The author would like to thank Hongxu Ding and Brian Yu for valuable advice and  
295 discussion.

296 **References**

- 297 1. Treutlein B, Brownfield DG, Wu AR, Neff NF, Mantalas GL, Espinoza FH, et al.  
298 Reconstructing lineage hierarchies of the distal lung epithelium using single-cell RNA-  
299 seq. *Nature*. 2014;509:371–5.  
300
- 301 2. Darmanis S, Sloan SA, Zhang Y, Enge M, Caneda C, Shuer LM, et al. A survey of  
302 human brain transcriptome diversity at the single cell level. *Proc. Natl. Acad. Sci.*  
303 2015;112:201507125.  
304
- 305 3. Petropoulos S, Edsga D, Reinius B, Linnarsson S. Single-Cell RNA-Seq Reveals  
306 Lineage and X Chromosome Dynamics in Human Preimplantation Resource Single-Cell  
307 RNA-Seq Reveals Lineage and X Chromosome Dynamics in Human Preimplantation  
308 Embryos. *Cell*. 2016;165:1–15.  
309
- 310 4. Tirosh I, Izar B, Prakadan SM, Wadsworth MH, Treacy D, Trombetta JJ, et al.  
311 Dissecting the multicellular ecosystem of metastatic melanoma by single-cell RNA-seq.  
312 *Science*. 2016;352:189–96.  
313
- 314 5. Krjutskov K, Katayama S, Saare M, Vera-Rodriguez M, Lubenets D, Samuel K, et al.  
315 Single-cell transcriptome analysis of endometrial tissue. *Hum. Reprod*. 2016;31:844–53.  
316
- 317 6. Guillaumet-adkins A, Rodríguez-esteban G, Mereu E, Vidal A, Gut M, Gut I, et al.  
318 Single Cell Transcriptome Conservation in Cryopreserved Cells and Tissues. *Genome*  
319 *Biol*. 2017;18:45.  
320
- 321 7. Thomsen ER, Mich JK, Yao Z, Hodge RD, Doyle AM, Jang S, et al. Fixed single-cell  
322 transcriptomic characterization of human radial glial diversity. *Nat. Methods*.  
323 2016;13:87–93.  
324
- 325 8. Alles J, Praktiknjo S, Karaikos N, Grosswendt S, Ayoub S, Schreyer L, et al. Cell  
326 fixation and preservation for droplet-based single-cell transcriptomics. *bioRxiv*. 2017.  
327
- 328 9. Rubinsky B. Principles of low temperature cell preservation. *Heart Fail. Rev*. 2003. p.  
329 277–84.  
330
- 331 10. Robinson NJ, Picken A, Coopman K. Low temperature cell pausing: An alternative  
332 short-term preservation method for use in cell therapies including stem cell applications.  
333 *Biotechnol. Lett*. 2014. p. 201–9.  
334

- 335 11. Belzer FO, Southard JH. Principles of solid-organ preservation by cold storage.  
336 Transplantation. 1988;45:673–6.  
337
- 338 12. Ikonovic M, Kelly KM, Hentosz TM, Shih SR, Armstrong DM, Taylor MJ.  
339 Ultraprofound cerebral hypothermia and blood substitution with an acellular synthetic  
340 solution maintains neuronal viability in rat hippocampus. *Cryo-Letters*. 2001;22:19–26.  
341
- 342 13. Ostrowska A, Gu K, Bode DC, Van Buskirk RG. Hypothermic storage of isolated  
343 human hepatocytes: A comparison between University of Wisconsin solution and a  
344 hypothermosol platform. *Arch. Toxicol*. 2009;83:493–502.  
345
- 346 14. Ginis I, Grinblat B, Shirvan MH. Evaluation of Bone Marrow-Derived Mesenchymal  
347 Stem Cells After Cryopreservation and Hypothermic Storage in Clinically Safe Medium.  
348 *Tissue Eng. Part C Methods*. 2012;18:453–63.  
349
- 350 15. Mathew AJ, Baust JM, Van Buskirk RG, Baust JG. Cell preservation in reparative  
351 and regenerative medicine: evolution of individualized solution composition. *Tissue Eng*.  
352 2004;10:1662–71.  
353
- 354 16. Cook JR, Eichelberger H, Robert S, Rauch J, Baust JG, Taylor MJ, et al. Cold-  
355 Storage of Synthetic Human Epidermis in HypoThermosol. *Tissue Eng*. 1995;1:361–77.  
356
- 357 17. Day AGE, Bhangra KS, Thanabalasundaram L, Grace N, Cameron G. Hypothermic  
358 and cryogenic preservation of artificial neural tissue made using differentiated CTX  
359 human neural stem cells in collagen gels. 2015;29:101599.  
360
- 361 18. Thomas MP, Liu X, Whangbo J, McCrossan G, Sanborn KB, Basar E, et al.  
362 Apoptosis Triggers Specific, Rapid, and Global mRNA Decay with 3' Uridylated  
363 Intermediates Degraded by DIS3L2. *Cell Rep*. 2015;11:1079–89.  
364
- 365 19. Jang HR, Rabb H. Immune cells in experimental acute kidney injury. *Nat. Rev.*  
366 *Nephrol*. 2015;11:88–101.  
367
- 368 20. Rogers NM, Ferenbach D a, Isenberg JS, Thomson AW, Hughes J. Dendritic cells  
369 and macrophages in the kidney: a spectrum of good and evil. *Nat. Rev. Nephrol*.  
370 2014;10:625–43.  
371
- 372 21. Kawakami T, Lichtnekert J, Thompson LJ, Karna P, Bouabe H, Hohl TM, et al.  
373 Resident renal mononuclear phagocytes comprise five discrete populations with distinct  
374 phenotypes and functions. *J. Immunol*. 2013;191:3358–72.  
375
- 376 22. Amir ED, Davis KL, Tadmor MD, Simonds EF, Levine JH, Bendall SC, et al. viSNE  
377 enables visualization of high dimensional single-cell data and reveals phenotypic  
378 heterogeneity of leukemia. *Nat. Biotechnol*. 2013;31:545–52.  
379



- 380 23. Kharchenko P V, Silberstein L, Scadden DT. Bayesian approach to single-cell  
381 differential expression analysis. *Nat. Methods*. 2014;11:740–2.  
382
- 383 24. Supek F, Bošnjak M, Škunca N, Šmuc T. Revigo summarizes and visualizes long lists  
384 of gene ontology terms. *PLoS One*. 2011;6.  
385
- 386 25. Chang Z, Li G, Liu J, Zhang Y, Ashby C, Liu D, et al. Bridger: a new framework for  
387 de novo transcriptome assembly using RNA-seq data. *Genome Biol*. 2015;16:30.  
388
- 389 26. Ye J, Ma N, Madden TL, Ostell JM. IgBLAST: an immunoglobulin variable domain  
390 sequence analysis tool. *Nucleic Acids Res*. 2013;41.  
391
- 392 27. Gupta NT, Vander Heiden JA, Uduman M, Gadala-Maria D, Yaari G, Kleinstein SH.  
393 Change-O: A toolkit for analyzing large-scale B cell immunoglobulin repertoire  
394 sequencing data. *Bioinformatics*. 2015;31:3356–8.  
395  
396

397 **Figure legends**

398 **Figure 1.**

399 Pipeline design. (A) Schematics and order of preservation, tissue dissociation, single-cell  
400 capture, and cDNA synthesis. (B) Criteria for data filtering.

401

402 **Figure 2.**

403 Quality comparison of single cells recovered from fresh and preserved samples (6h-4d) in  
404 terms of (A) Overall cell viability (PI-), Cd45+ population abundance, success rates  
405 getting sufficient cDNA for sequencing. (B) 5'-3' read coverage on exons. (C)  
406 Distribution of numbers of detected genes over preservation time. (D) tSNE on all  
407 detected genes. (Coloring in B, C, D all follows legend in B.)

408

409 **Figure 3.**

410 Cell types in kidney resident immune cells and the impact of preservation on cell type  
411 heterogeneity. (A) Definition of putative cell clusters on 2d tSNE. (B) Distribution of  
412 putative clusters in fresh and preserved tissues (6h-4d). (C) Identification of putative  
413 clusters with known cell types using hierarchical clustering on a canonical panel of genes  
414 defining major immune lineages. (D) Expression of representative genes differentially  
415 expressed in cluster 8 (color bar shown in  $\log_2(\text{rpm}+1)$ ). (E) Hierarchy of enriched  
416 ontology terms for differentially expressed genes in putative cluster 8. (All coloring and  
417 numbering for cluster ID in B, C follow those in A; coloring for preservation time  
418 follows the legend in Fig 2B.)

419

420 **Figure 4.**

421 The impact of preservation on the transcriptome profile for each identified cell type. Pair-  
422 wise Pearson correlation between cells within and across preservation conditions for  
423 identified myeloid (A) and lymphoid (B) populations (Numbers shown are the mediums  
424 of each pair of compared distributions; Cell type numbering corresponds to cluster ID in  
425 Fig 3A, and cell type identity follows that in Fig 3C). (C) Expression of components of B  
426 cell antibodies (Ig) and T cell receptors (TCR) in identified lymphoid populations (con:  
427 constant region, var: variable region). (D) Distribution of success in extracting full-length  
428 transcript sequence for heavy and light chains in all identified B cells. (Coloring for  
429 preservation time and cluster ID in C, D follow that in Fig 2B and 3A, respectively.)

430

431

432 **Additional files**

433 **Additional file 1: Figure S1.** Overall viability and abundance of Cd45+ cells across  
434 different durations of preservation time. At the bottom of each panel, the percentage in  
435 white was calculated as: counts of PI- events / counts of all events for the top panels, and  
436 counts of Cd45+ events / counts of all events for the bottom panels. Raw counts were  
437 shown in the fractions. **Figure S2.** cDNA concentration and smearing assessed via  
438 fragment analysis for single Cd45+ cells from mouse kidneys after different durations of  
439 preservation. **Figure S3.** 5'-3' read coverage on exons for single cells from mouse  
440 kidneys after different durations of time. **Figure S4.** Distribution of skewness of 5'-3'  
441 read coverage on exons for single cells from mouse kidneys after different durations of  
442 time. **Figure S5.** (A) Number of genes detected cast on 2d tSNE. (B) Uniquely  
443 expressing genes identified for each putative cell clusters. (Coloring of cluster ID follows  
444 that in Fig 3A.) (PDF 6MB)

445

446 **Additional file 2:** Table S1. Differentially expressed genes in the putative cluster (cluster  
447 8). (CSV 5KB)

448

449 **Additional file 3:** Table S2. GO ontology of genes differentially expressed in the  
450 putative cluster (cluster 8). (CSV 2KB)

451

452 **Additional file 4:** Table S3. Detailed annotation on assembled full-length transcripts for  
453 antibody heavy and light chains in all identified B cells. (CSV 9KB)

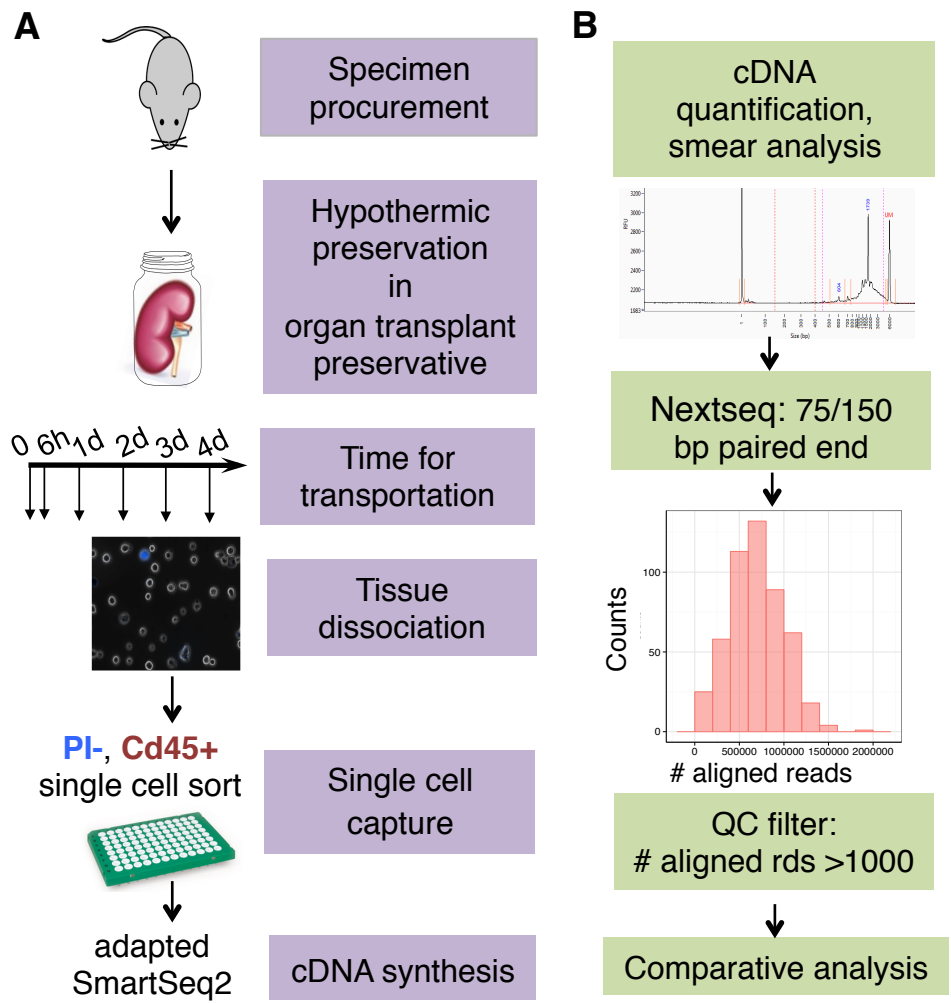

Figure 1. Pipeline design. (A) Schematics and order of preservation, tissue dissociation, single-cell capture, and cDNA synthesis. (B) Criteria for data filtering.

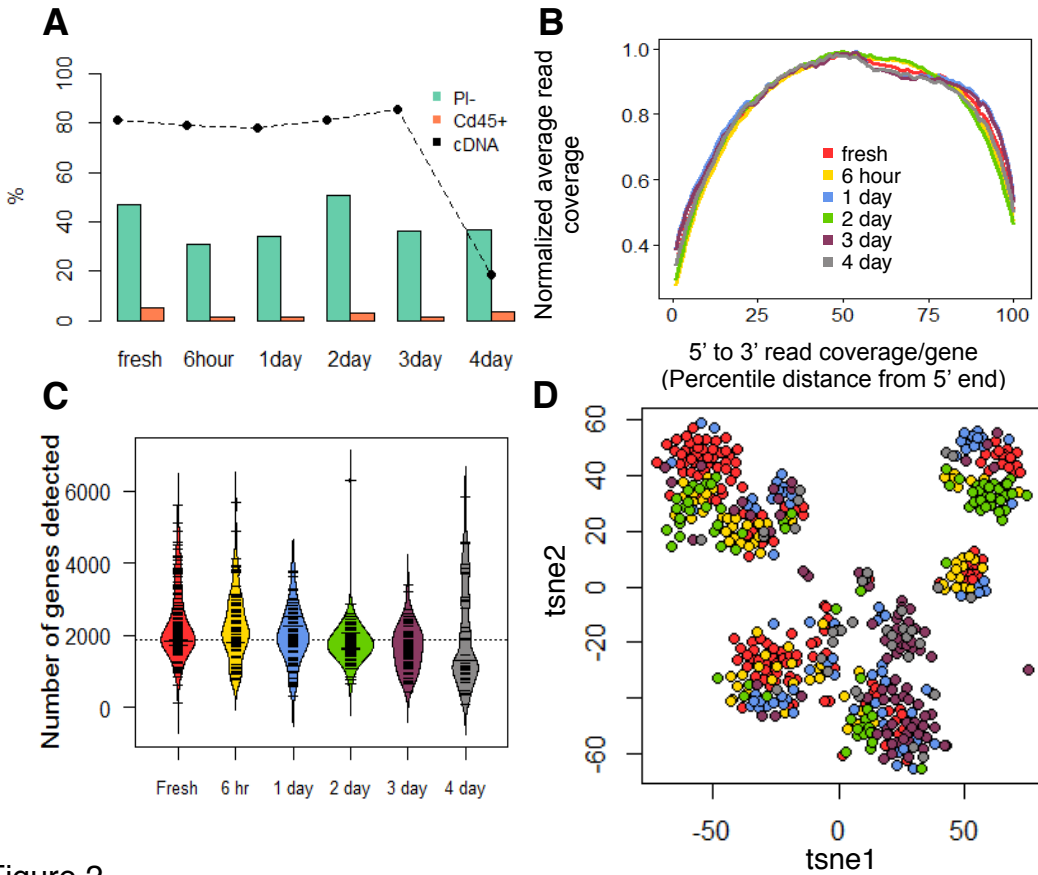

Figure 2.

Quality comparison of single cells recovered from fresh and preserved samples (6h-4d) in terms of (A) Overall cell viability (PI-), Cd45+ population abundance, success rates getting sufficient cDNA for sequencing. (B) 5'-3' read coverage on exons. (C) Distribution of number of detected genes over preservation time. d tSNE on all detected genes. (Coloring in B, C, D all follows legend in B)

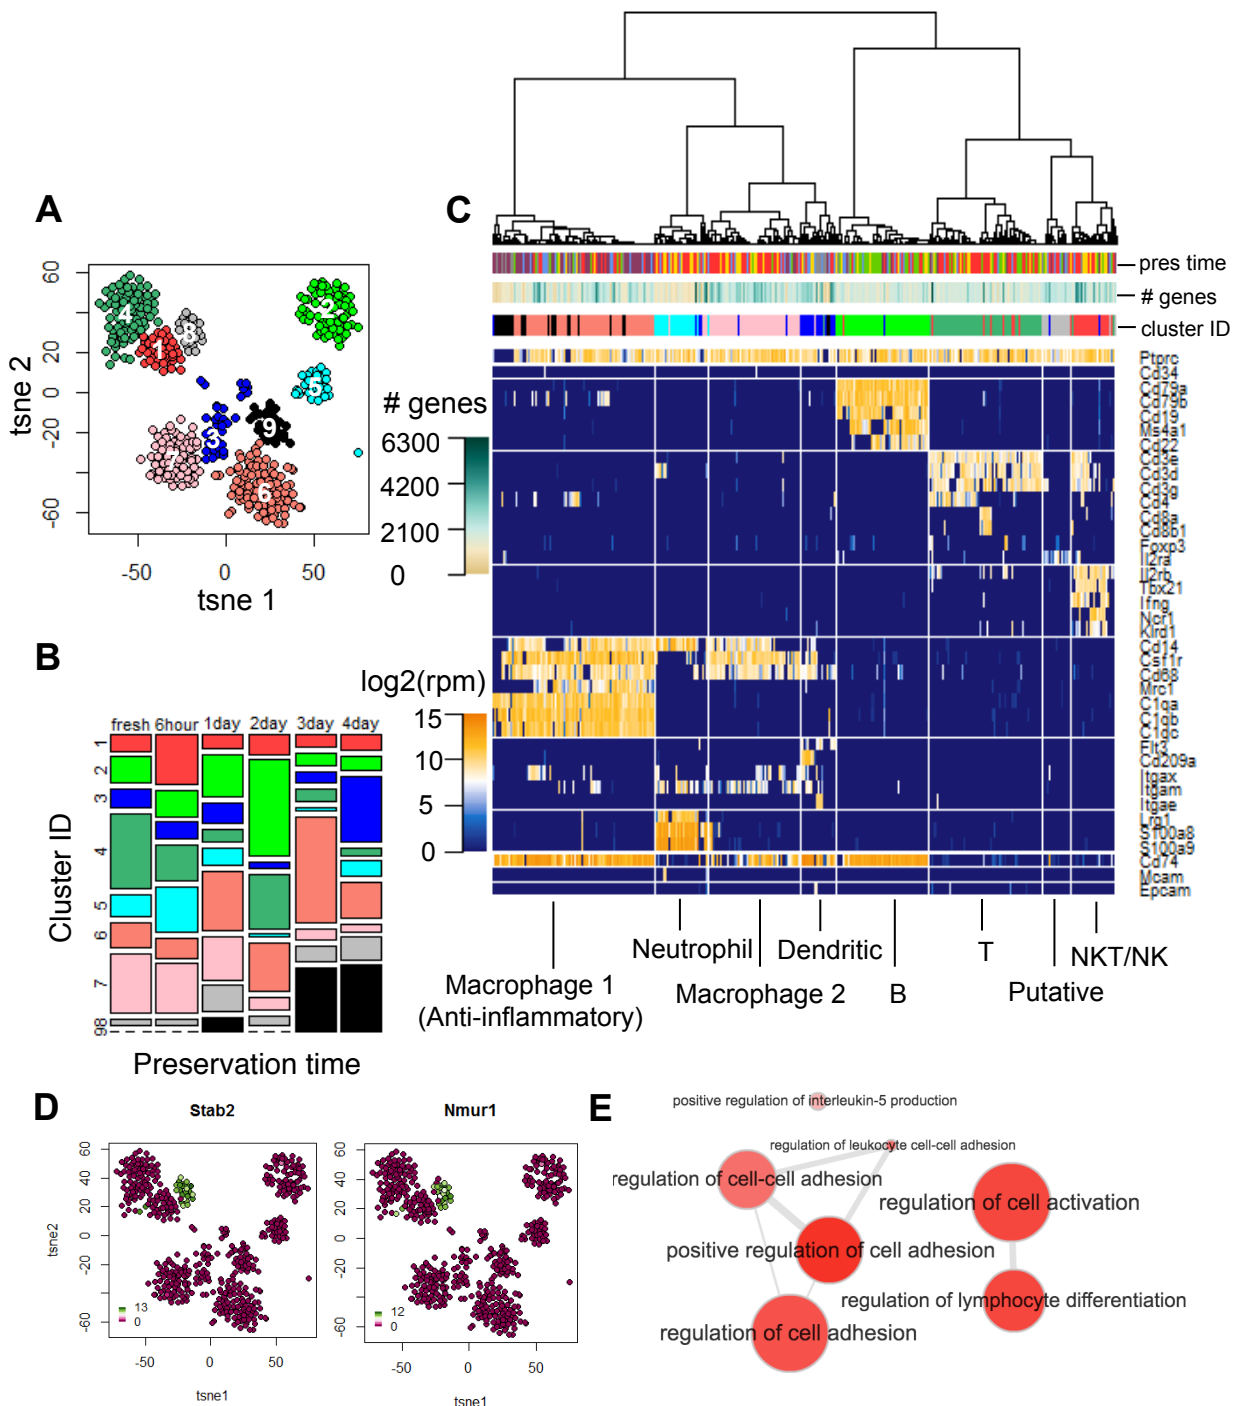

**Figure 3.**

Cell types in kidney resident immune cells and the impact of preservation on cell type heterogeneity. (A) Definition of putative cell clusters on 2d tsne. (B) Distribution of putative clusters in fresh and preserved tissues (6h-4d). (C) Identification of putative clusters with known cell types using hierarchical clustering on a canonical panel of genes defining major immune lineages. (D) Expression of representative genes differentially expressed in cluster 8 (color bar shown in log<sub>2</sub>(rpm+1)). (E) Hierarchy of enriched functional terms for differentially expressed genes in putative cluster 8. (All coloring and numbering for cluster id in B, C follow those in a; coloring for preservation time follow that in Fig. 2B.)

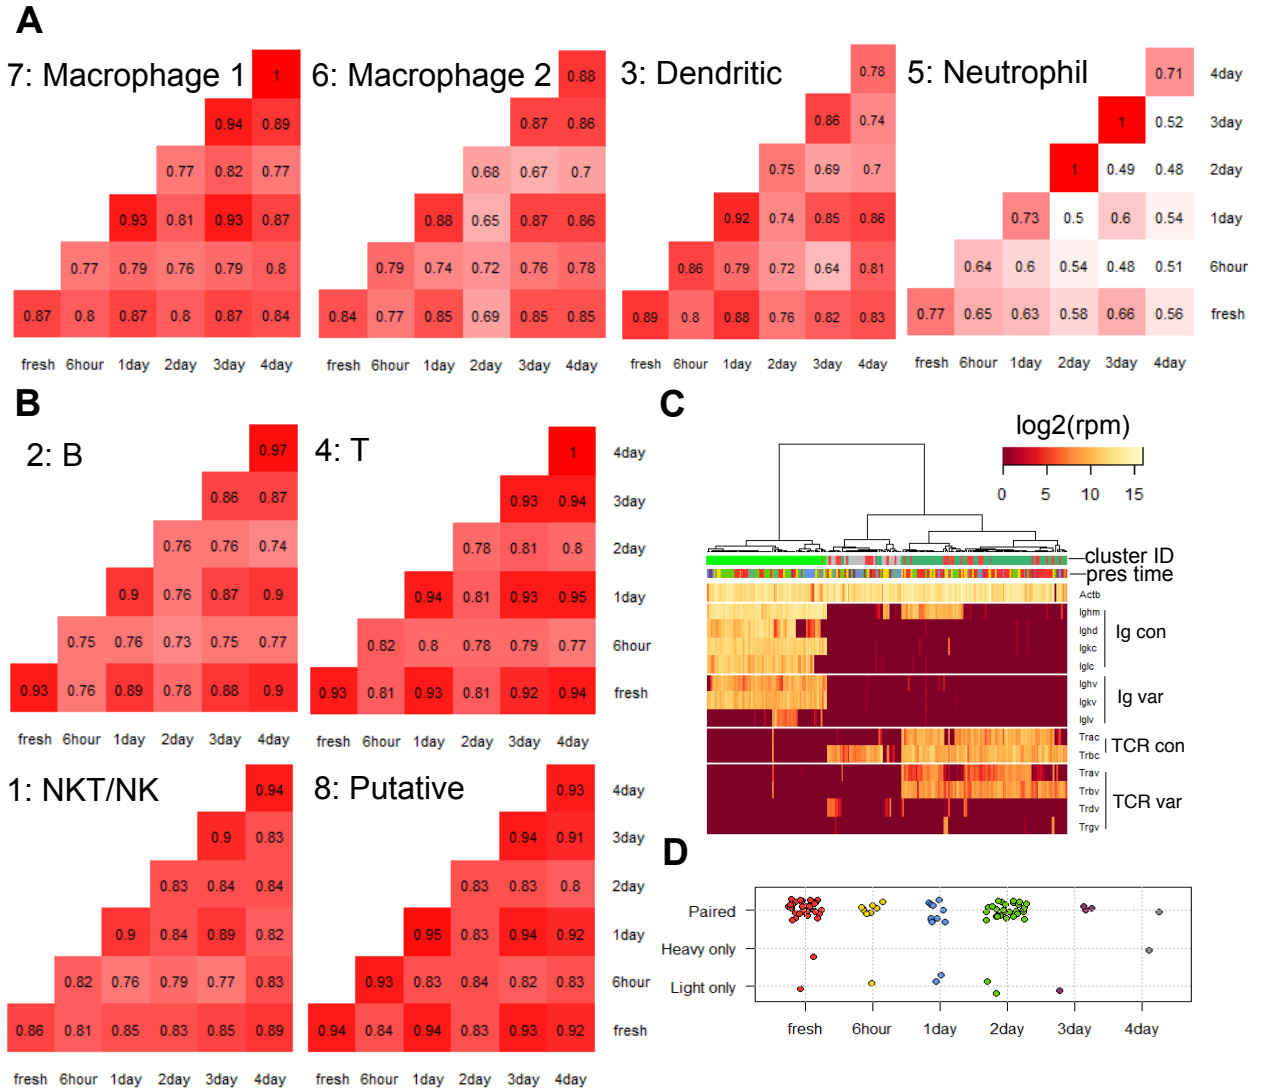

Figure 4.

The impact of preservation on the transcriptome profile for each identified cell type. Pair-wise correlation between cells within and across preservation conditions for myeloid (A) and lymphoid (B) populations (Numbers shown are the medians of each pair of compared distributions. Cell type numbering corresponds to cluster ID in Fig 3A, and cell type identity follows that in Fig 3C ). (C) Expression of components of B cell antibodies and T cell receptors in identified lymphoid populations. (D) Distribution of success in extracting full-length transcript sequence for heavy and light chains in all identified B cells. (Coloring for preservation time and cluster ID in C, D follow that in Fig 2B and 3A, respectively.)
